# Supplementary material for: A Novel and Efficient Method for the Synthesis of Methyl (R)-10-Hydroxystearate and FAMEs from Sewage Scum
Source: MDPI journal article supplement (doi:10.3390/catal11060663), 2021-05-23
Supplement: s1 [file s1]

## SUPPLEMENTARY MATERIAL

Article

# A novel and efficient method for the synthesis of Methyl (R)-10-hydroxystearate and FAMEs from sewage scum

Luigi di Bitonto, Valeria D'Ambrosio and Carlo Pastore\*

<sup>1</sup> Water Research Institute (IRSA), National Research Council (CNR), via F. de Blasio 5, 70132 Bari, Italy

\* Correspondence: carlo.pastore@ba.irsna.cnr.it

### List of Figures

#### Methyl estolides characterization

**Figure S1.** GC-CHROMATOGRAM OF METHYL ESTOLIDES ISOLATED BY DISTILLATION PROCESS.

**Figure S2.** FTIR SPECTRA OF METHYL ESTOLIDES.

**Figure S3.** GC-MS CHROMATOGRAM OF 10-(PALMITOYLOXY)-STEARIC METHYL ESTER.

**Figure S4.** GC-MS CHROMATOGRAM OF 10-(STEAROYLOXY)-STEARIC METHYL ESTER.

#### Methyl 10-(R)-hydroxystearate characterization

**Figure S5.** GC-CHROMATOGRAM OF METHYL 10-(R)-HYDROXYSTEARATE ISOLATED.

**Figure S6.** FTIR SPECTRA OF METHYL 10-(R)-HYDROXYSTEARATE.

**Figure S7.** GC-MS CHROMATOGRAM OF METHYL 10-(R)-HYDROXYSTEARATE.

**Figure S8.** <sup>1</sup>H NMR OF ISOLATED METHYL 10-(R)-HYDROXYSTEARATE.

#### FAMEs characterization

**Figure S9.** COMPARISON OF CHROMATOGRAPHIC PROFILES OF FAS OBTAINED FROM METHYL ESTOLIDES AND LIPIDS EXTRACTED FROM SEWAGE SCUM.

#### Enantiomeric excess evaluation

**Figure S10.** CHEMICAL STRUCTURES OF DERIVATIZING AGENTS (D1, D2 AND D3) USED FOR THE DETERMINATION OF THE ABSOLUTE CONFIGURATION OF THE METHYL 10-HYDROXY STEARIC ACID (M10-HAS) ISOLATED FROM SEWAGE SCUM.

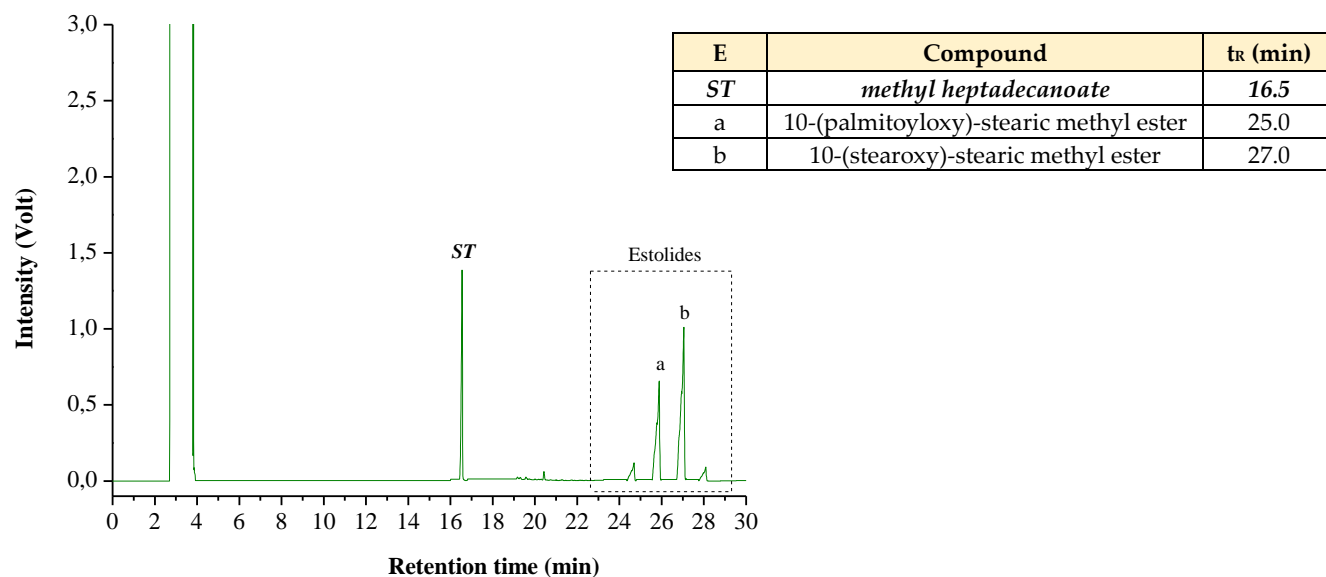

Figure S1. GC-chromatogram of methyl estolides isolated by distillation process.

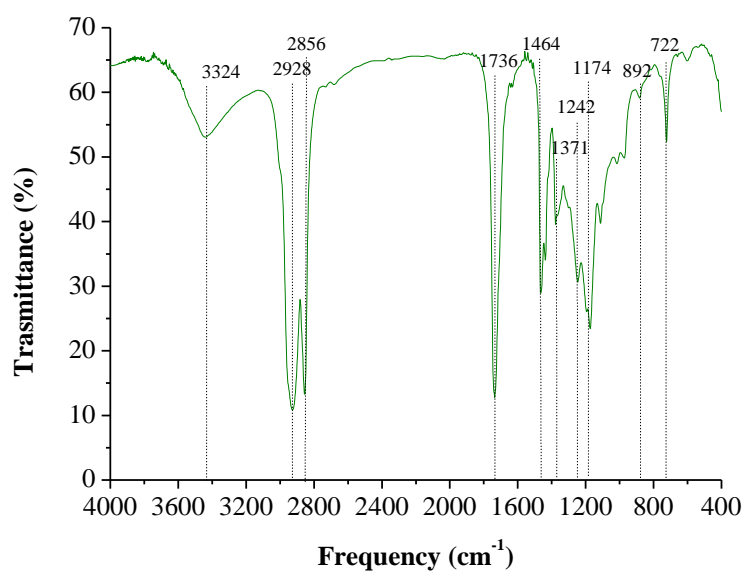

Figure S2. FTIR spectra of methyl estolides.

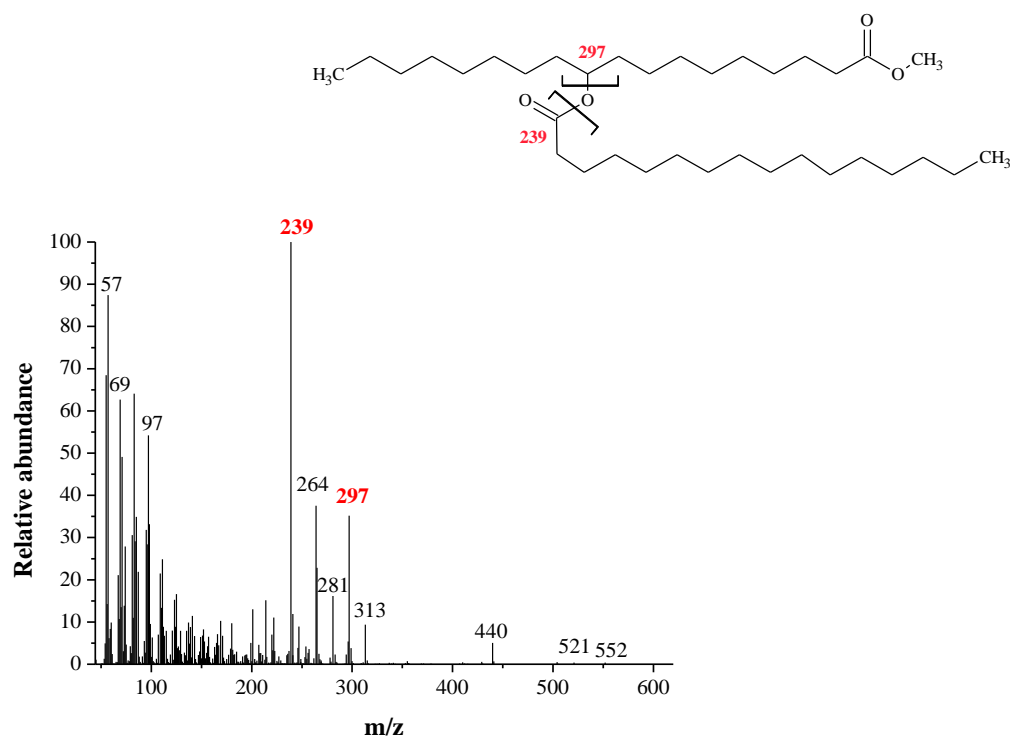

Figure S3. GC-MS chromatogram of 10-(palmitoyloxy)-stearic methyl ester.

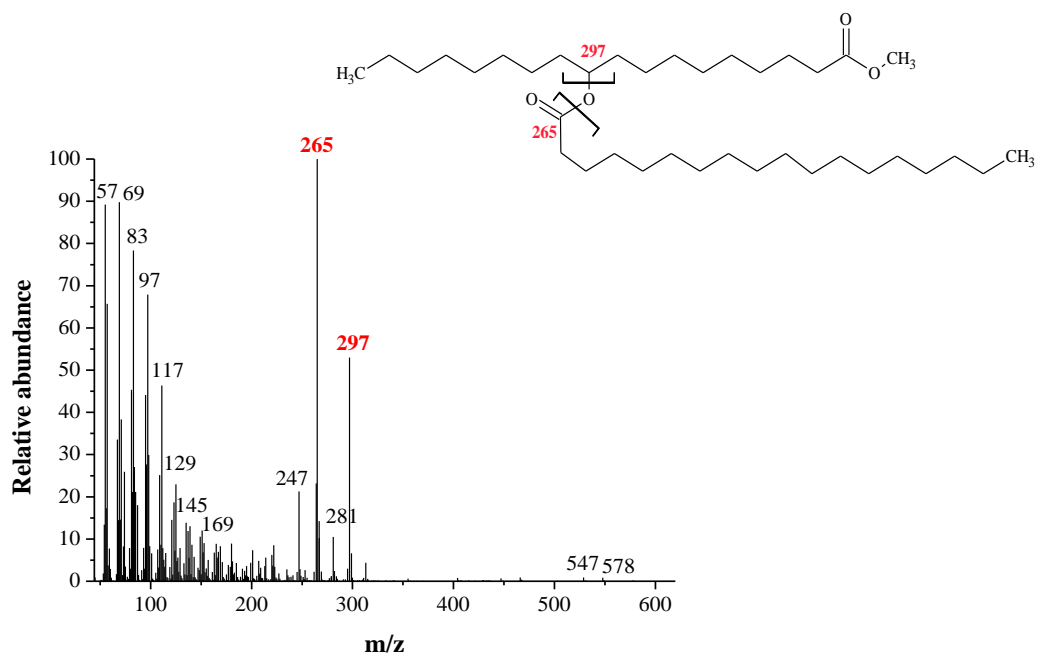

Figure S4. GC-MS chromatogram of 10-(stearoyloxy)-stearic methyl ester.

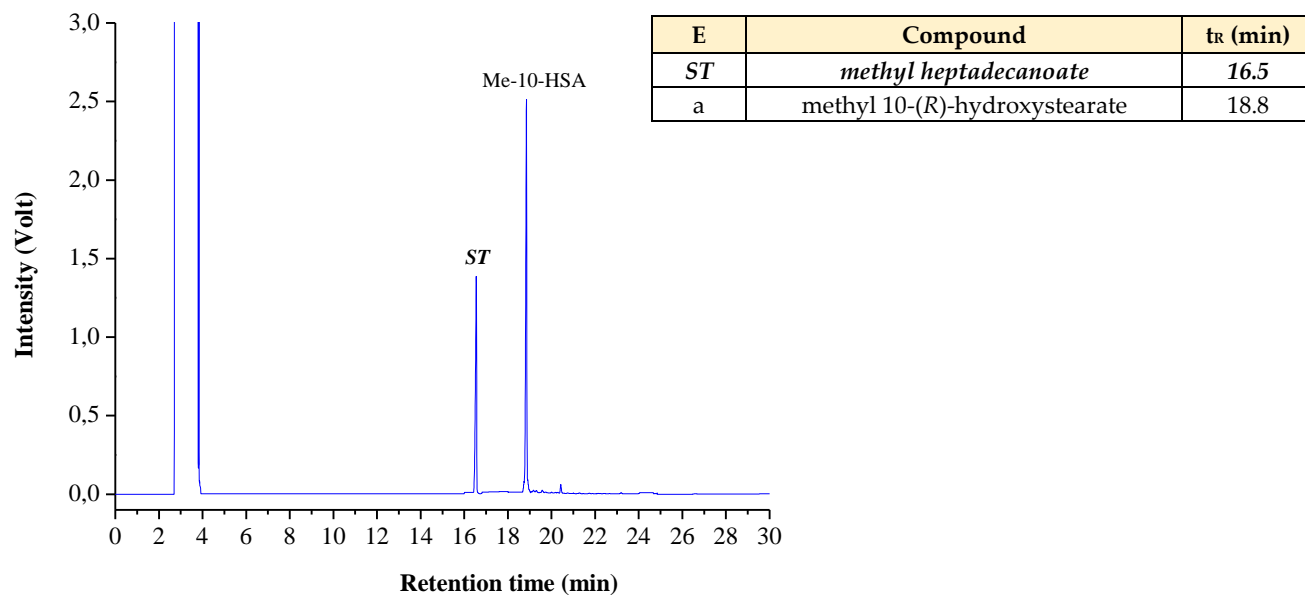

Figure S5. GC-chromatograph of methyl 10-(R)-hydroxystearate isolated.

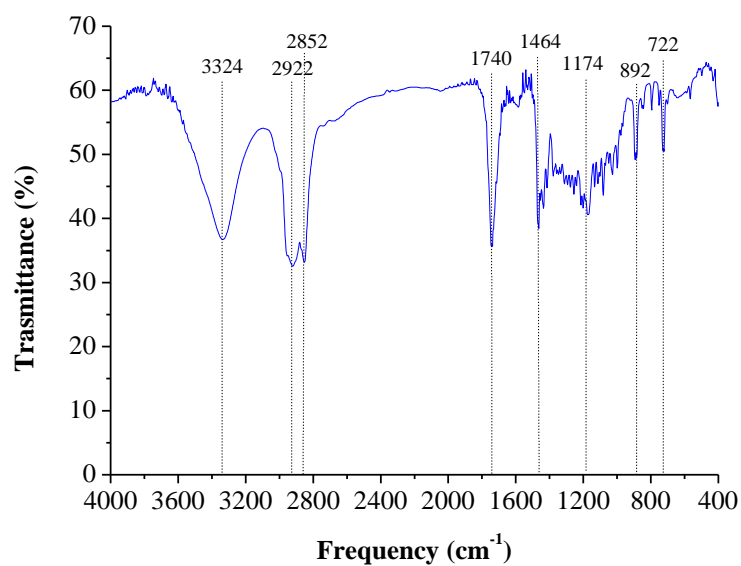

Figure S6. FTIR spectra of methyl 10-(R)-hydroxystearate.

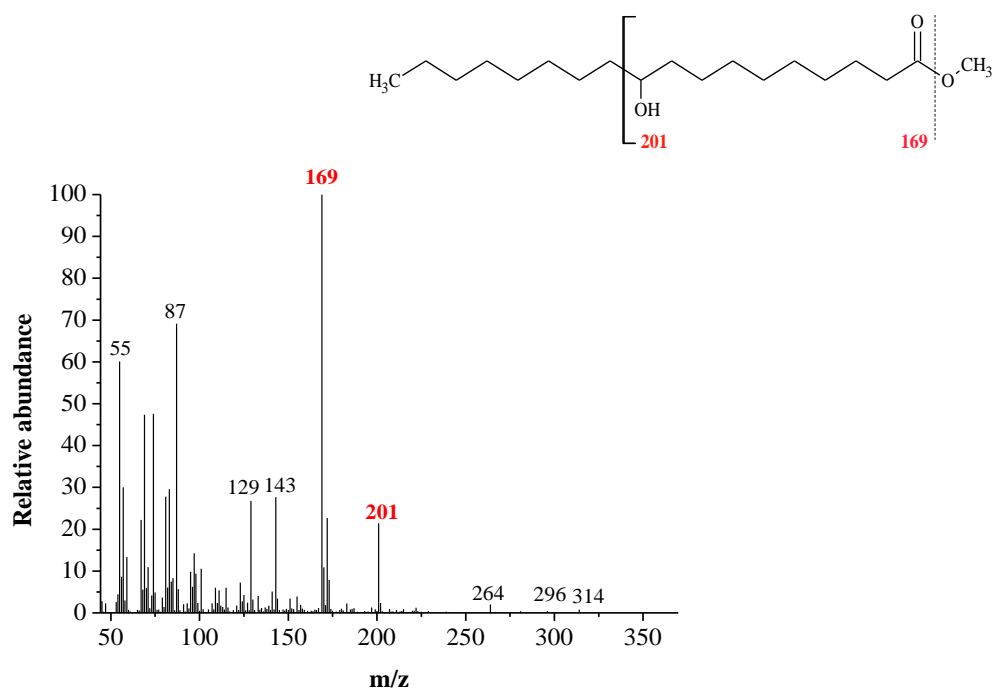

Figure S7. GC-MS chromatogram of methyl 10-(R)-hydroxystearate.

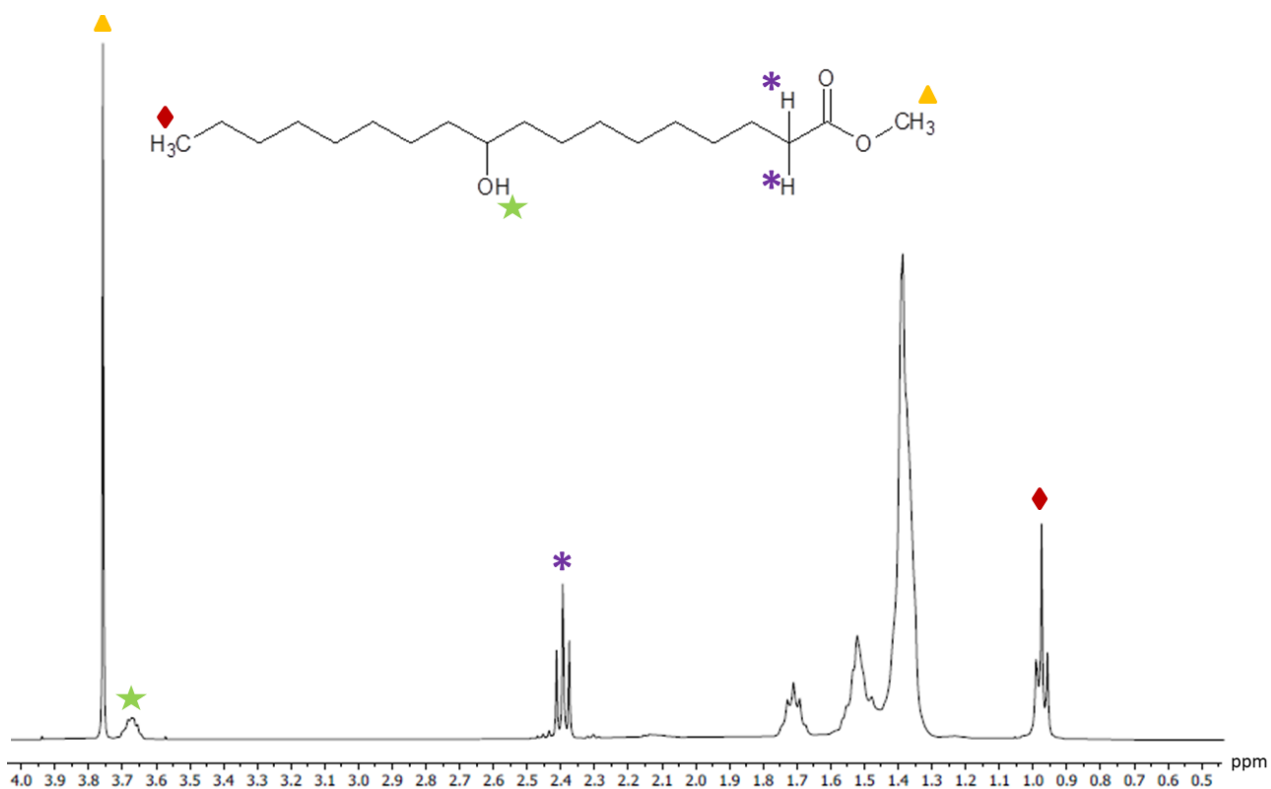

Figure S8. <sup>1</sup>H NMR of methyl 10-(R)-hydroxystearate.

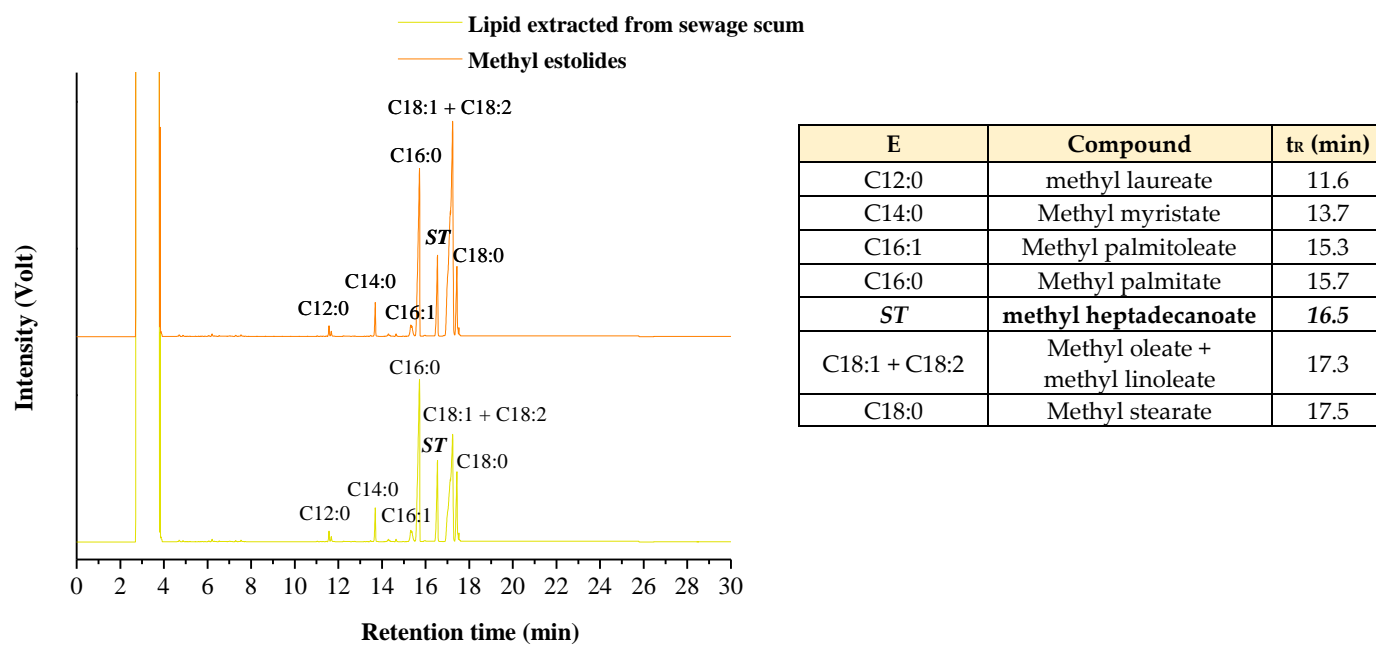

**Figure S9.** Comparison of chromatographic profiles of FAs obtained from methyl estolides and lipids extracted from sewage scum.

**Determination of the absolute configuration of Methyl-10-hydroxy stearic acid.** In order to evaluate the absolute configuration of the isolated Methyl 10-Hydroxy stearic acid, three derivatizing agents were adopted: (R)-1-phenyl-ethyl-isocyanate (D1), (S)-1-phenyl-propyl-isocyanate (D2) and (S)-O-Acetyl-mandelic acid (D3). Diastereoisomeric compounds were analyzed and compared with the analogous derived from racemic mixtures through GC-FID and  $^1\text{H}$  NMR, as recently described [28].

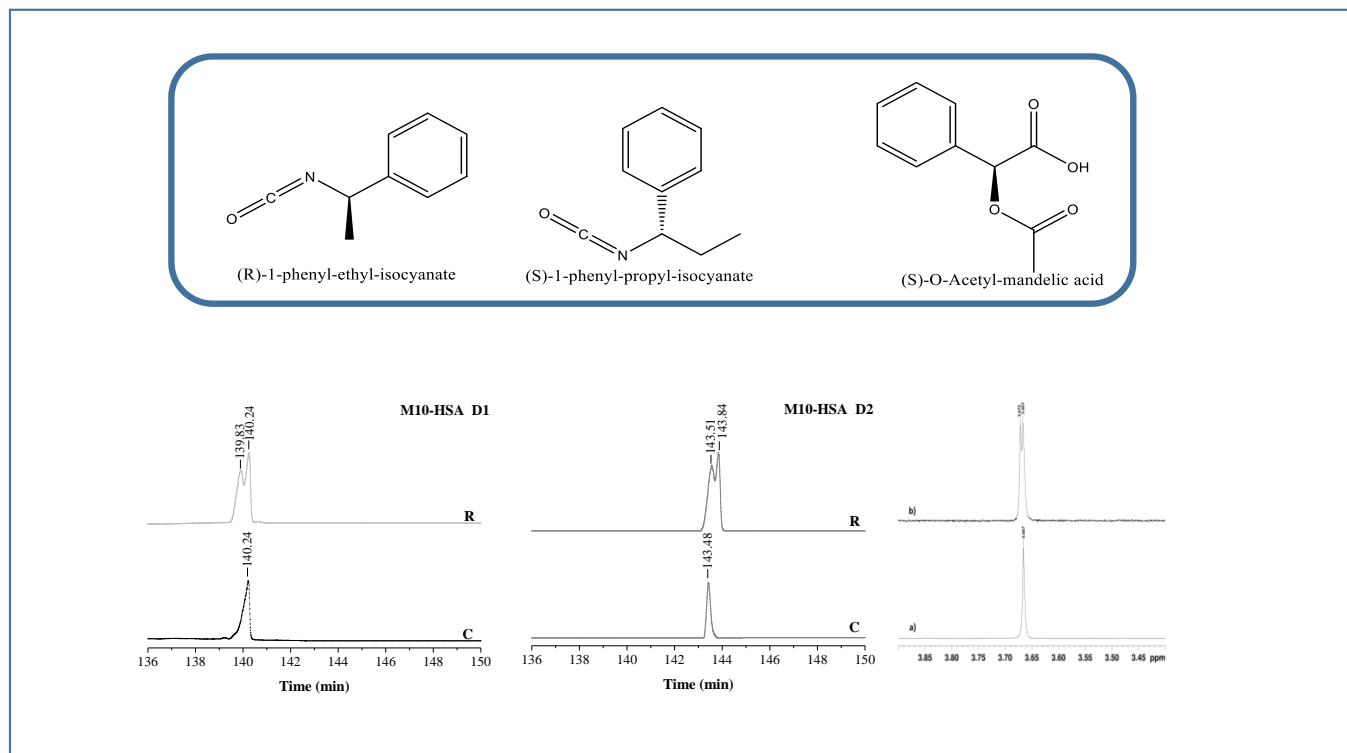

**Figure S10.** Chemical structures of derivatizing agents (D1, D2 and D3) used for the determination of the absolute configuration of the Methyl 10-Hydroxy stearic acid (M10-HAS) isolated from sewage scum. Comparison of GC-FID chromatograms (10HSA D1 and 10HSA D2) obtained from the isolated M10-HAS (c traces) and racemic sample (R traces). Traces a) and b) were referred to  $^1\text{H}$  NMR of diastereoisomers obtained from reaction of M10-HAS and D3 and racemic M10-HAS and D3, respectively, as described in Yang *et al.*, *App. Environ. Microb.* 1993, 59, 281–284 and in di Bitonto *et al. Bioresour. Technol. Rep.* 2020, 9, 100382.
